# Supplementary material for: Introducing [Mn(CO)3(tpa-κ3N)]+ as a novel photoactivatable CO-releasing molecule with well-defined iCORM intermediates – synthesis, spectroscopy, and antibacterial activity
Source: Royal Society of Chemistry journal article supplement (doi:10.1039/c3dt51848e), 2014-01-01
Supplement: c3dt51848e1.pdf [file c3dt51848e1.pdf]

**Introducing  $[\text{Mn}(\text{CO})_3(\text{tpa}-\kappa^3\text{N})]^+$  as a novel photoactivatable  
CO-releasing molecule with well-defined iCORM intermediates -  
synthesis, spectroscopy, and antibacterial activity**

**Christoph Nagel,<sup>a</sup> Samantha McLean,<sup>b</sup> Robert Poole,<sup>b</sup> Holger Braunschweig,<sup>a</sup> Thomas Kramer,<sup>a</sup>  
and Ulrich Schatzschneider\*<sup>a</sup>**

<sup>a</sup>Institut für Anorganische Chemie,  
Julius-Maximilians-Universität Würzburg, Am Hubland, D-97074 Würzburg, Germany  
Fax: +49 931 3184605  
eMail: ulrich.schatzschneider@uni-wuerzburg.de

<sup>b</sup>Department of Molecular Biology and Biotechnology, The University of Sheffield,  
Western Bank, Sheffield S10 2TN, UK

**Supporting Information**

## Experimental

**Synthesis of ligands and precursors.** Tris(2-pyridylmethyl)amine (tpa) was synthesized from 2-picolylchloride hydrochloride and 2-picolylamine following the procedure of Tyeklár and Karlin.<sup>1</sup> Polymeric  $[\text{RuCl}_2(\text{CO})_2]_n$  was prepared from ruthenium trichloride trihydrate and paraformaldehyde in degassed formic acid according to White *et al.*<sup>2</sup>

**Synthesis of  $[\text{Ru}(\text{CO})_2(\text{tpa-}\kappa^4\text{N})](\text{PF}_6)_2$ .**  $[\text{Ru}(\text{CO})_2\text{Cl}_2]_n$  (500 mg, 2.2 mmol) and tris(2-pyridylmethyl)amine (725 mg, 2.6 mmol) were dissolved in degassed ethanol (30 mL) under argon and heated to reflux for 2 h. Then, a saturated solution of ammonium hexafluorophosphate in water was added to precipitate the product as a white solid, which was collected and recrystallized by diffusion of diethylether into a solution of the crude compound in acetone, leading to the formation of colorless crystals which were suitable for X-ray structure analysis. Yield: 50% (781 mg, 1.1 mmol). Elemental analysis (%): calc.  $\text{C}_{20}\text{H}_{18}\text{F}_{12}\text{N}_4\text{O}_2\text{P}_2\text{Ru}$ : C 32.58, H 2.46, N 7.60, found: C 33.88, H 2.47, N 7.91; IR (ATR,  $\text{cm}^{-1}$ ): 3383 (m), 2095 (vs,  $\text{C}\equiv\text{O}$ ), 2033 (vs,  $\text{C}\equiv\text{O}$ ), 1614 (w), 1448 (w), 820 (vs), 763 (vs);  $^1\text{H}$  NMR (acetone- $d_6$ , 200.13 MHz):  $\delta$  9.40 (d, 1H,  $^3J = 5.7$  Hz, tpa-H6), 8.96 (d, 2H,  $^3J = 5.7$  Hz, tpa-H6), 8.17 (dt, 2H,  $^3J = 7.8$  Hz,  $^4J = 1.5$  Hz, tpa-H5), 8.04 (dt, 1H,  $^3J = 7.9$  Hz,  $^4J = 1.4$  Hz, tpa-H5), 7.93 (d, 2H,  $^3J = 7.2$  Hz, tpa-H4), 7.63 (m, 3H, tpa-H4/3), 7.50 (d, 1H,  $^3J = 7.6$  Hz, tpa-H3), 5.88 (d, 2H,  $^2J = 16.1$  Hz,  $\text{CH}_2$ ), 5.67 (d, 2H,  $^2J = 16.1$  Hz,  $\text{CH}_2$ ), 5.49 (s, 2H,  $\text{CH}_2$ );  $^{13}\text{C}$  NMR (acetone- $d_6$ , 50.32 MHz):  $\delta$  162.61 (tpa-C2), 162.45 (tpa-C2), 156.82 (tpa-C6), 153.20 (tpa-C6), 141.92 (tpa-C5 2x overlapping), 127.70 (tpa-C4), 127.13 (tpa-C4), 126.28 (tpa-C3), 123.63 (tpa-C3), 71.82 ( $\text{CH}_2$ ), 69.43 ( $\text{CH}_2$ ), 2x  $\text{M}(\text{C}\equiv\text{O})$  not detected; MS (ESI<sup>+</sup>,  $\text{CH}_3\text{CN}$ ):  $m/z$ : 455.0236  $\{(\text{Ru}(\text{CO})(\text{tpa-}\kappa^4\text{N})\text{Cl})\}^+$ , 483.0152  $\{[\text{Ru}(\text{CO})_2(\text{tpa-}\kappa^4\text{N})]\text{Cl}\}^+$ , 593.0115  $\{[\text{Ru}(\text{CO})_2(\text{tpa-}\kappa^4\text{N})]\text{PF}_6\}^+$ , 1330.9902  $\{[\text{Ru}(\text{CO})_2(\text{tpa-}\kappa^4\text{N})]_2(\text{PF}_6)_3\}^+$ .

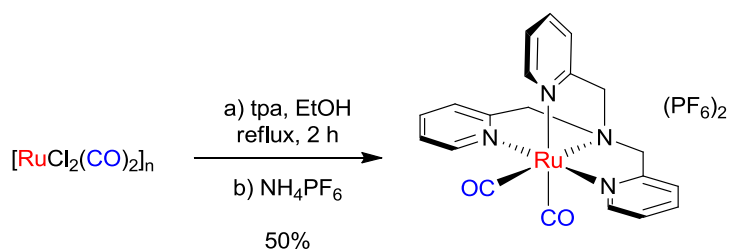

**Scheme S1** Synthesis of  $[\text{Ru}(\text{CO})_2(\text{tpa-}\kappa^4\text{N})](\text{PF}_6)_2$  from  $[\text{Ru}(\text{CO})_2\text{Cl}_2]_n$  and tris(2-pyridylmethyl)amine (tpa) in degassed ethanol at reflux.

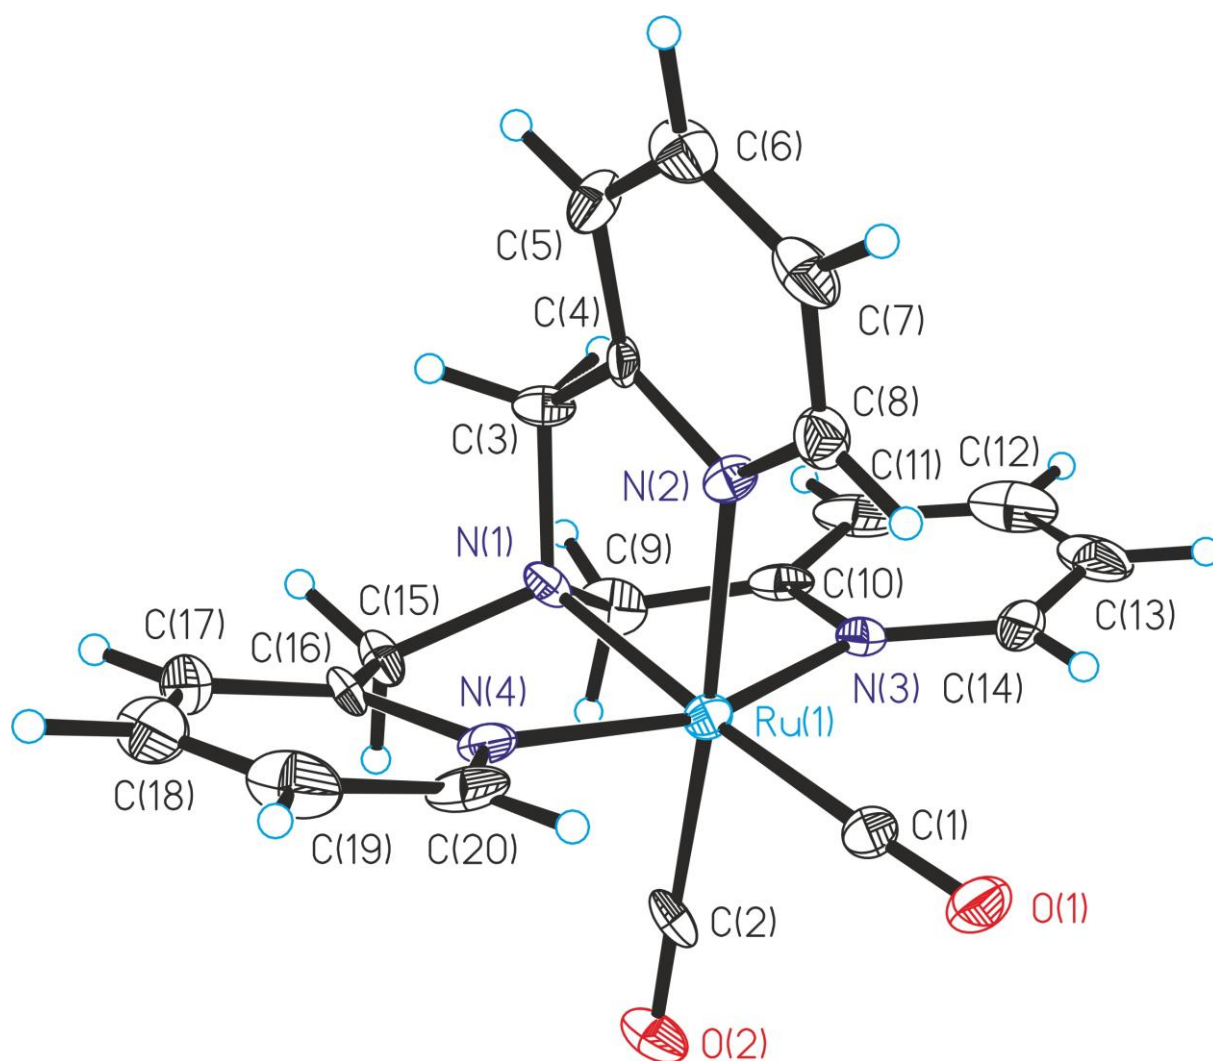

**Figure S1** Molecular structure of  $[\text{Ru}(\text{CO})_2(\text{tpa-}\kappa^4\text{N})]^{2+}$  with ellipsoids drawn at the 50% probability level. The two hexafluorophosphate counterions are not shown for clarity.

**Table S1** Crystallographic parameters for [Ru(CO)<sub>2</sub>(tpa-κ<sup>4</sup>N)](PF<sub>6</sub>)<sub>2</sub>

|                                                                |                                                                                                 |
|----------------------------------------------------------------|-------------------------------------------------------------------------------------------------|
| Empirical formula                                              | C <sub>20</sub> H <sub>18</sub> F <sub>12</sub> N <sub>4</sub> O <sub>2</sub> P <sub>2</sub> Ru |
| Formula weight (g·mol <sup>-1</sup> )                          | 737.39                                                                                          |
| Temperature (K)                                                | 100(2)                                                                                          |
| Radiation, λ (Å)                                               | MoKα 0.71073                                                                                    |
| Crystal system                                                 | Orthorhombic                                                                                    |
| Space group                                                    | <i>P</i> 2 <sub>1</sub> 2 <sub>1</sub> 2 <sub>1</sub>                                           |
| <i>Unit cell dimensions</i>                                    |                                                                                                 |
| <i>a</i> (Å)                                                   | 11.967(6)                                                                                       |
| <i>b</i> (Å)                                                   | 13.361(7)                                                                                       |
| <i>c</i> (Å)                                                   | 15.789(7)                                                                                       |
| α (°)                                                          | 90.00                                                                                           |
| β (°)                                                          | 90.00                                                                                           |
| γ (°)                                                          | 90.00                                                                                           |
| Volume (Å <sup>3</sup> )                                       | 2525(2)                                                                                         |
| <i>Z</i>                                                       | 4                                                                                               |
| Calculated density (Mg·m <sup>-3</sup> )                       | 1.940                                                                                           |
| Absorbtion coefficient (mm <sup>-1</sup> )                     | 0.866                                                                                           |
| <i>F</i> (000)                                                 | 1456                                                                                            |
| Theta range for collection                                     | 2.00 to 26.02°                                                                                  |
| Reflections collected                                          | 18820                                                                                           |
| Independent reflections                                        | 4897                                                                                            |
| Minimum/maximum transmission                                   | 0.6437/0.7454                                                                                   |
| Refinement method                                              | Full-matrix least-squares on <i>F</i> <sup>2</sup>                                              |
| Data / parameters / restraints                                 | 4897 / 352 / 78                                                                                 |
| Goodness-of-fit on <i>F</i> <sup>2</sup>                       | 1.054                                                                                           |
| Final R indices [I>2σ(I)]                                      | R <sub>1</sub> = 0.0603, wR <sup>2</sup> = 0.1327                                               |
| R indices (all data)                                           | R <sub>1</sub> = 0.0948, wR <sup>2</sup> = 0.1497                                               |
| Maximum/minimum residual electron density (e·Å <sup>-3</sup> ) | 1.603 / -1.519                                                                                  |

**Table S2** HOMO-3 to LUMO+8 of  $[\text{Mn}(\text{CO})_3(\text{tpa-}\kappa^3\text{N})]^+$  calculated with BP86/TZVP. Isosurface values are plotted at  $\pm 0.05$ , with positive values shown in red and negative ones in blue.

| Orbital | Energy<br>in eV<br>(occupation) | Character          | molecular orbital plot                                                               |
|---------|---------------------------------|--------------------|--------------------------------------------------------------------------------------|
| 118     | 0.3452<br>(0)                   | $\pi^*(\text{CO})$ | 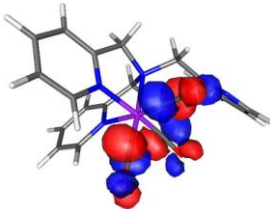   |
| 117     | -0.5004<br>(0)                  | $\pi^*(\text{CO})$ |    |
| 116     | -0.5475<br>(0)                  | $\pi^*(\text{py})$ |   |
| 115     | -1.0551<br>(0)                  | $\pi^*(\text{py})$ |  |
| 114     | -1.2292<br>(0)                  | $\pi^*(\text{py})$ |  |
| 113     | -1.3755<br>(0)                  | $\pi^*(\text{py})$ |  |

**Table S2 continued**

|               |                |             |                                                                                      |
|---------------|----------------|-------------|--------------------------------------------------------------------------------------|
| 112           | -1.7197<br>(0) | $\pi^*(py)$ | 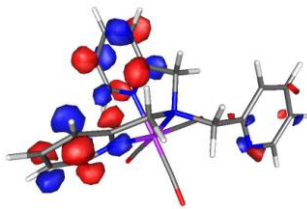   |
| 111           | -2.1192<br>(0) | $\pi^*(py)$ |    |
| 110<br>(LUMO) | -2.3659<br>(0) | $\pi^*(py)$ |    |
| 109<br>(HOMO) | -6.2979<br>(2) | d(Mn)       |   |
| 108           | -6.6190<br>(2) | d(Mn)       |  |
| 107           | -6.6847<br>(2) | d(Mn)       |  |
| 106           | -7.4893<br>(2) | $\pi(py)$   |  |
| 105           | -7.5291<br>(2) | $\pi(py)$   |  |

**Table S3** TDDFT difference densities for the most important singlet excitations for  $[\text{Mn}(\text{CO})_3(\text{tpa-}\kappa^3\text{N})]^+$  in the 230 to 600 nm range, calculated with B3LYP/TZVP. Isosurface values are plotted at  $\pm 0.002$ , with positive values shown in green and negative ones in red.

| state | $\lambda$ nm | $f_{\text{osc}}$ | difference density plot                                                              |
|-------|--------------|------------------|--------------------------------------------------------------------------------------|
| 1     | 406.2        | 0.0340           | 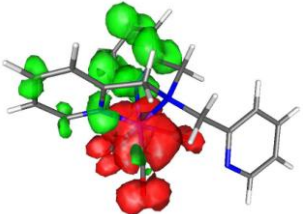   |
| 3     | 376.5        | 0.0609           |    |
| 4     | 360.8        | 0.0805           |   |
| 5     | 358.4        | 0.0736           |  |
| 6     | 346.7        | 0.0617           |  |
| 7     | 337.4        | 0.0119           |  |
| 10    | 310.8        | 0.0139           |  |

**Table S3 continued**

|    |       |        |                                                                                      |
|----|-------|--------|--------------------------------------------------------------------------------------|
| 16 | 272.3 | 0.0145 | 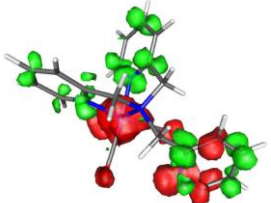   |
| 17 | 297.8 | 0.0130 |    |
| 21 | 262.0 | 0.0109 |    |
| 29 | 242.3 | 0.0133 |   |
| 32 | 244.1 | 0.0799 |  |
| 33 | 235.1 | 0.0193 |  |

**Model calculations on the effect of replacement of coordinated DMSO by water**

In order to validate the approach of using coordinated water instead of DMSO to keep the computational demand acceptable in structures **B**, **B'**, **D**, and **D'**, very simple model systems, in which all nitrogen donor groups are replaced by ammine ligands were constructed and the calculations then repeated on  $[\text{Mn}(\text{CO})_3(\text{NH}_3)_3]^+$  as well as  $[\text{Mn}(\text{CO})_2(\text{NH}_3)_3(\text{OH}_2)]^+$ ,  $[\text{Mn}(\text{CO})_2(\text{dmsO-}\kappa\text{O})(\text{NH}_3)_3]^+$ , and  $[\text{Mn}(\text{CO})_2(\text{dmsO-}$



$\kappa S)(\text{NH}_3)_3]^+$ . The effect of this simplification on the calculated Mn-N, Mn-C, and C $\equiv$ O bond distances in  $[\text{Mn}(\text{CO})_3(\text{tpa}-\kappa^3 N)]^+$  vs.  $[\text{Mn}(\text{CO})_3(\text{NH}_3)_3]^+$  was totally negligible, with absolute individual differences not exceeding 0.04 Å and an average deviation over all parameters of exactly zero. Furthermore, the effect of replacing a  $\kappa O$ -bound DMSO by water in the model system also had a negligible effect on the optimized geometry. Mn-N, Mn-C, and C $\equiv$ O bond distances are virtually identical in both structures and the variation in the Mn-O bond is just 0.06 Å. Therefore, it is not surprising that the C $\equiv$ O stretches are also calculated to be essentially the same in  $[\text{Mn}(\text{CO})_2(\text{NH}_3)_3(\text{OH}_2)]^+$  vs.  $[\text{Mn}(\text{CO})_2(\text{dmsO}-\kappa O)(\text{NH}_3)_3]^+$ , with a deviation of only 1 cm<sup>-1</sup> for the antisymmetrical and 14 cm<sup>-1</sup> for the symmetrical mode. With the exception of the Mn-O vs. Mn-S bond,  $[\text{Mn}(\text{CO})_2(\text{dmsO}-\kappa S)(\text{NH}_3)_3]^+$  also gave Mn-N, Mn-C, and C $\equiv$ O bond distances very similar to the other two dicarbonyl model structures. The symmetrical and antisymmetrical C $\equiv$ O stretching vibrations showed more significant differences to the aquo and  $\kappa O$ -bound DMSO systems though, of about 70–85 cm<sup>-1</sup>. However, since among the 73 entries in the CSD database (version 5.34) of structurally characterized manganese-DMSO compounds, there is not a single one with the dimethylsulfoxide coordinated via the soft sulfur atom, we conclude that this binding mode is not relevant and thus does not need to be further considered here. In summary, these calculations clearly demonstrate that the modelling of the coordinated solvent by aquo ligands is a valid one, since the replacement of  $\text{dmsO}-\kappa O$  by H<sub>2</sub>O has a negligible effect on the calculated bond distances and vibrations. Furthermore, the DMSO solvent was still accounted for at least in the form of the COSMO model.

## References

1. Z. Tyeklár, R. R. Jacobson, N. Wei, N. N. Murthy, J. Zubietta and K. D. Karlin, *J. Am. Chem. Soc.*, 1993, **115**, 2677.
2. P. A. Anderson, G. B. Deacon, K. H. Haarmann, F. R. Keene, T. J. Meyer, D. A. Reitsma, B. W. Skelton, G. F. Strouse, N. C. Thomas, J. A. Treadway and A. H. White, *Inorg. Chem.*, 1995, **34**, 6145.
